# Supplementary material for: Human blood RNA stabilization in samples collected and transported for a large biobank
Source: PubMed Central journal article supplement (PMC3503553; doi:10.1186/1756-0500-5-510), 2012-09-18

### Additional file 3 – Temperature recordings for transported samples vs RIN, RNA yield and Raw Cq-value

Temperatures were monitored during the transportation of the samples to four different locations (hospitals) in Norway. The four samples were sent by standard mail at February 21<sup>th</sup> and all samples returned to NIPH at February 24<sup>th</sup>. Transportation time for samples sent to Bærum, Kristiansand and Bergen was ~ 48 hours, while it took ~ 74 hours for Kirkenes samples to return to NIPH. The temperature variations ranged from 3.4°C to 27.1 °C, and none of the samples were frozen during the transportation. A) Temperature recordings for samples sent to the four locations and samples kept at NIPH; B) RIN values vs. average temperature (°C) of the samples; C) RNA yields vs. average temperature (°C) of the samples; D) The non-normalized raw Cq-values vs. average temperature (°C) of the samples. Each bar represents the average Cq-values and the error bar indicates ± SE for the raw Cq-values or ± SD for average temperature (°C) of the samples.

#### A) Temperature log for transported samples

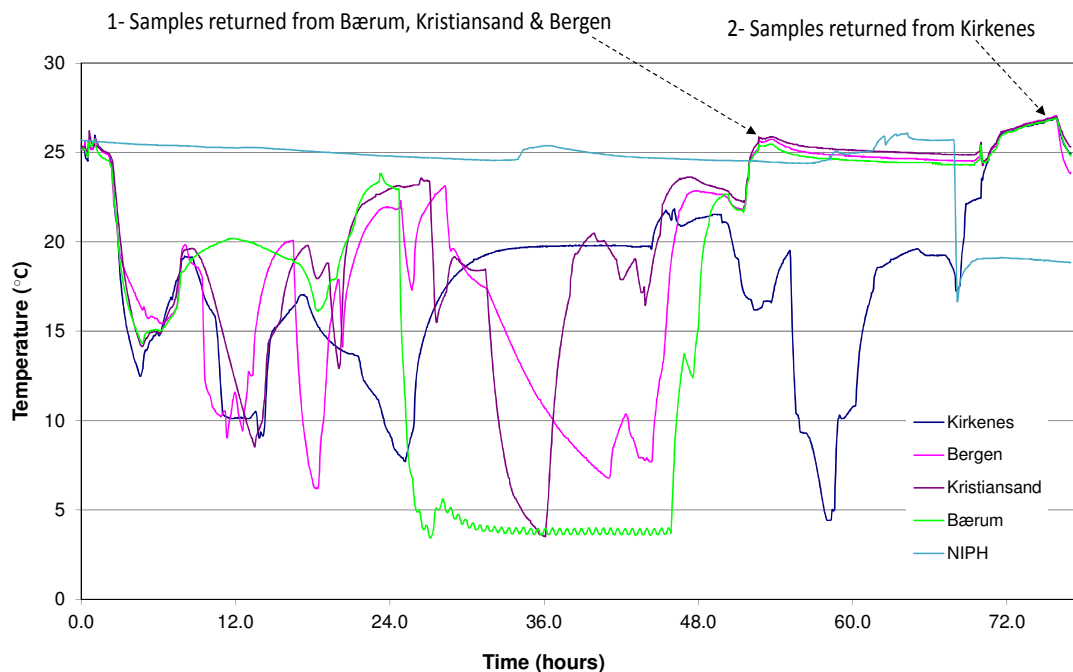

|                                                                        | Kirkenes     | Bergen       | Kristiansand | Bærum        | NIPH          |
|------------------------------------------------------------------------|--------------|--------------|--------------|--------------|---------------|
| <b>Mean temp. (°C) ± SD</b>                                            | 17.6 ± 4.9   | 19.1 ± 6.1   | 20.3 ± 5.6   | 17.0 ± 8.5   | 24.4 ± 1.9    |
| <b>(Min - Max)</b>                                                     | (4.4 - 27.0) | (6.2 - 27.1) | (3.5 - 27.0) | (3.4 - 26.9) | (16.6 - 26.1) |
| <b>Average temp. difference between NIPH &amp; transported samples</b> | 7.4          | 5.9          | 4.7          | 8.0          | 0             |

| <b>Averaged temperature (°C) recordings divided into 12-hour intervals</b> |          |           |            |            |           |           |
|----------------------------------------------------------------------------|----------|-----------|------------|------------|-----------|-----------|
|                                                                            | 0h - 12h | 12h - 24h | 24h - 36h  | 36h - 48h  | 48h - 60h | 60h - 76h |
| <b>Kirkenes</b>                                                            | 17.6     | 13.3      | 16.7       | 20.2       | 14.8      | 21.5      |
| <b>Bergen</b>                                                              | 17.7     | 16.0      | 17.8       | 11.5       | 24.3      | 25.2      |
| <b>Kristiansand</b>                                                        | 18.6     | 17.2      | 15.4       | 18.8       | 24.6      | 25.4      |
| <b>Bærum</b>                                                               | 19.2     | 19.8      | <b>6.0</b> | <b>5.2</b> | 23.8      | 25.1      |
| <b>NIPH</b>                                                                | 25.4     | 25.1      | 24.7       | 24.9       | 24.6      | 22.2      |

### B) RIN-value vs average temperature recordings

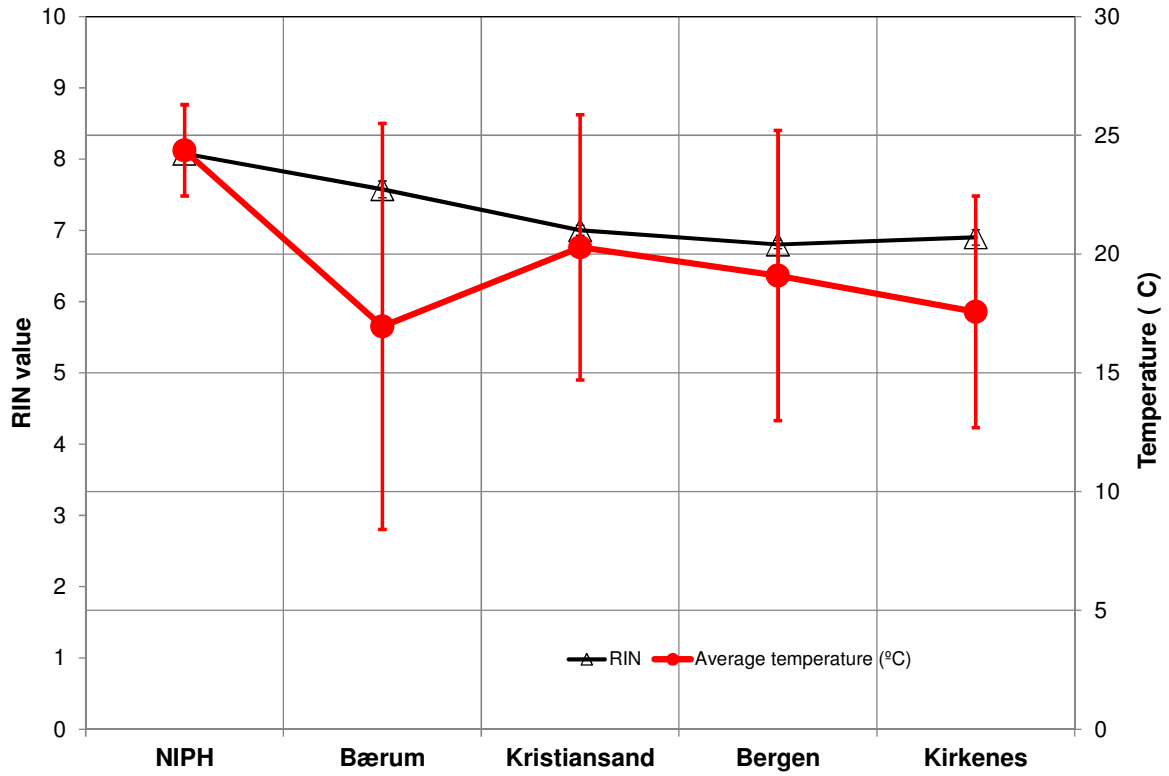

### C) RNA yield vs average temperature recordings

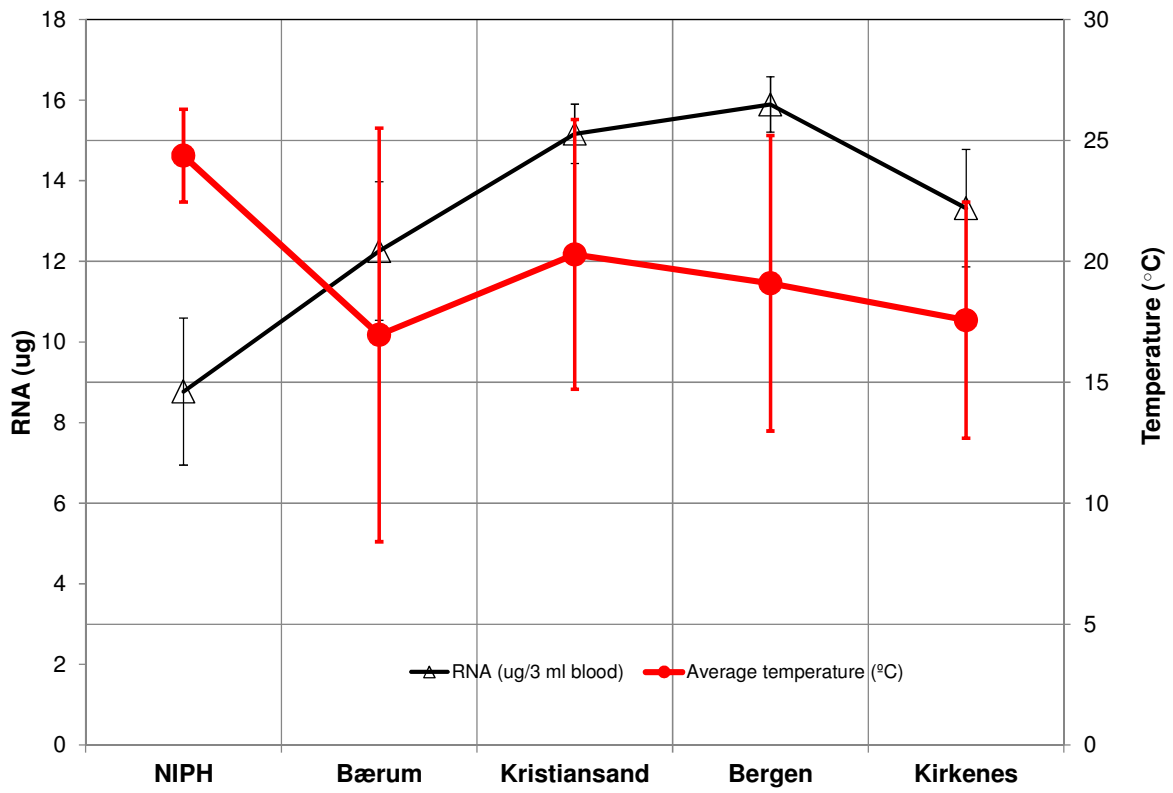

### D) Non-normalized raw Cq-value vs. average temperature recordings

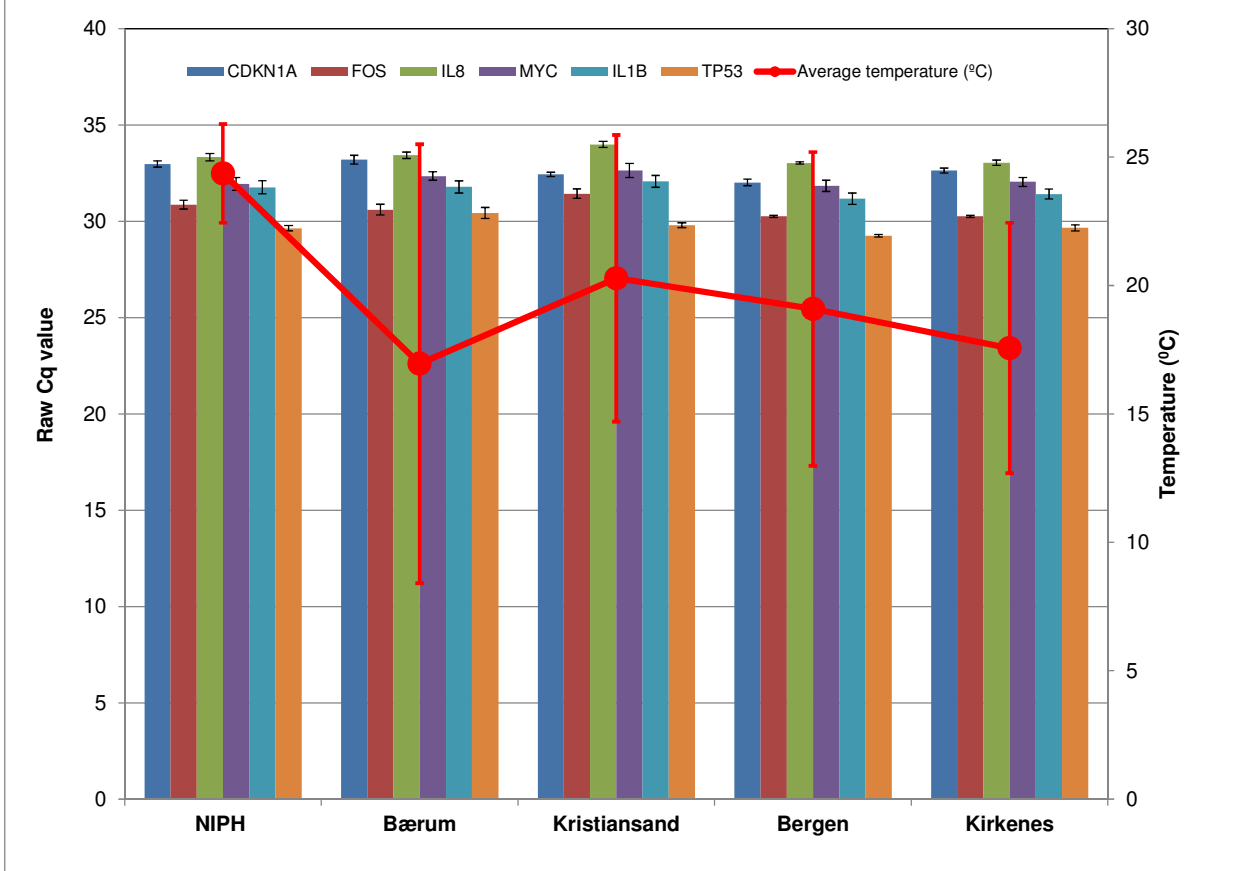

Supplement: 1756-0500-5-510-S2.pdf [file 1756-0500-5-510-S2.pdf]
