# Supplementary material for: Human blood RNA stabilization in samples collected and transported for a large biobank
Source: PubMed Central journal article supplement (PMC3503553; doi:10.1186/1756-0500-5-510), 2012-09-18

## Additional file 2 – The non-normalized raw Cq-values for PAXgene vs Tempus tubes

A) The non-normalized raw Cq-values for adult blood samples collected in the PAXgene tubes;  
 B) The non-normalized raw Cq-values for adult blood samples collected in the Tempus tubes; C)  
 The non-normalized raw Cq-values for cord blood samples collected in the PAXgene and in the  
 Tempus tubes. Each bar represents the average Cq-values and the error bar indicates  $\pm$  SE.

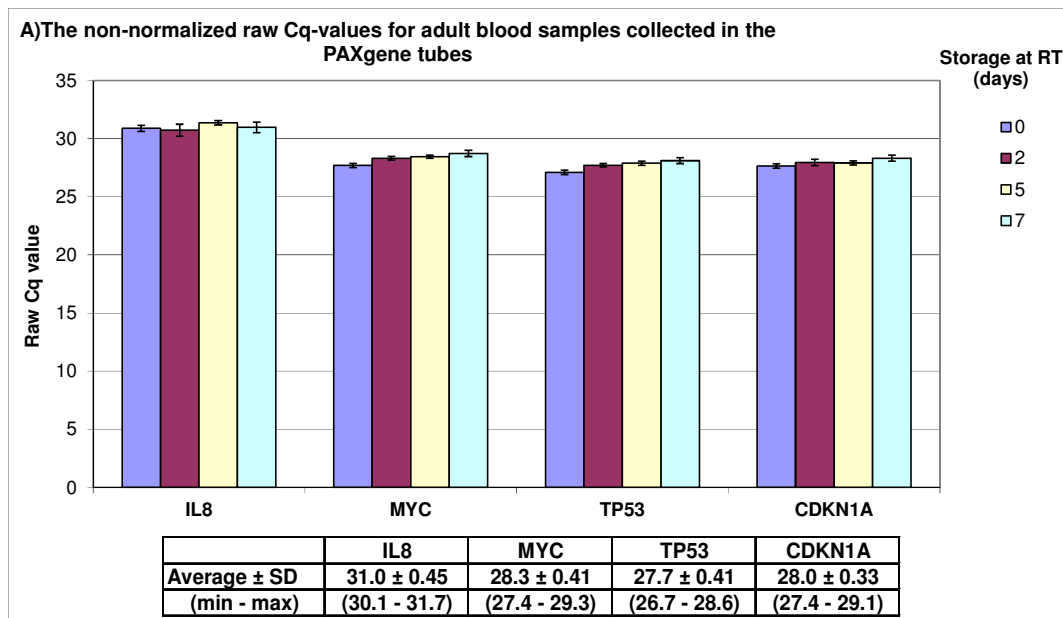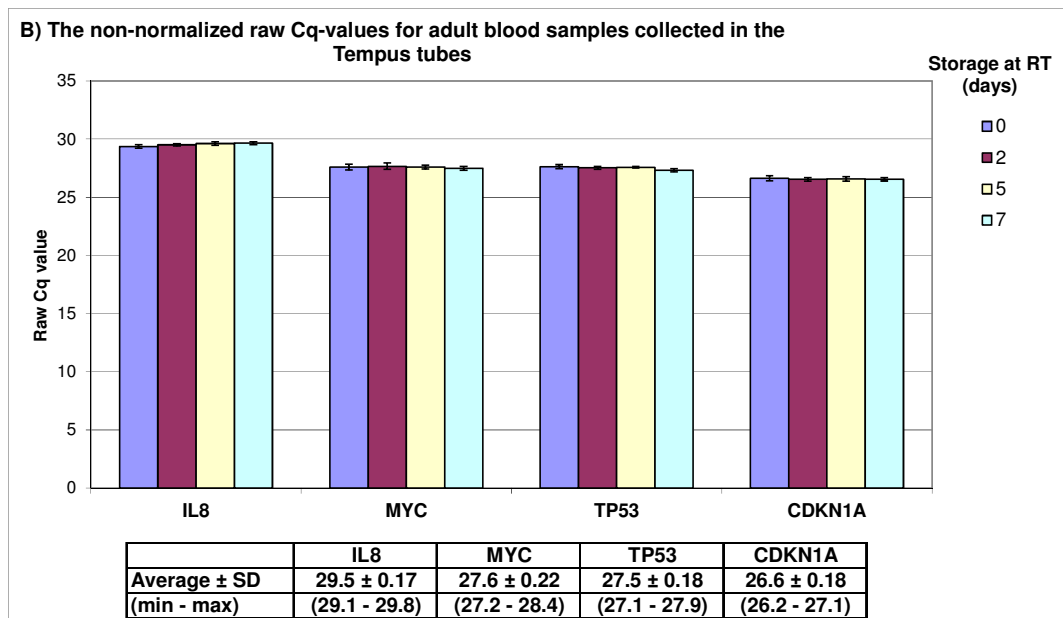

C) The non-normalized raw Cq-values for cord blood samples collected in the PAXgene and in the Tempus tubes

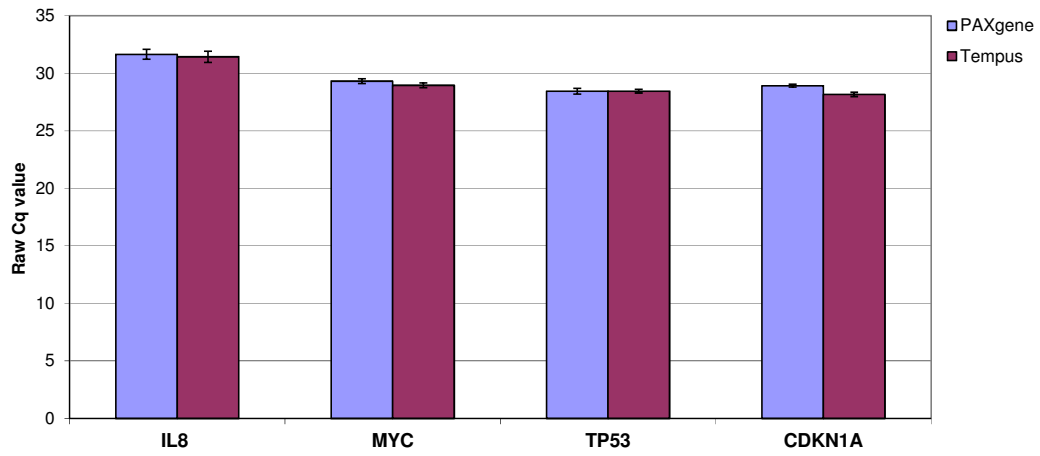

Supplement: 1756-0500-5-510-S1.pdf [file 1756-0500-5-510-S1.pdf]
