# Supplementary material for: Human blood RNA stabilization in samples collected and transported for a large biobank
Source: PubMed Central journal article supplement (PMC3503553; doi:10.1186/1756-0500-5-510), 2012-09-18
Supplement: 1756-0500-5-510-S3.pdf [file 1756-0500-5-510-S3.pdf]

### Additional file 4 – The non-normalized raw *Cq*-values for suboptimal blood volume QC

A) Evaluation of the non-normalized raw *Cq*-values for suboptimal blood volume QC from adult blood samples; and B) Evaluation of the non-normalized raw *Cq*-values for suboptimal blood volume QC from cord blood samples. Each bar represents the average *Cq*-values and the error bar indicates  $\pm$  SE.

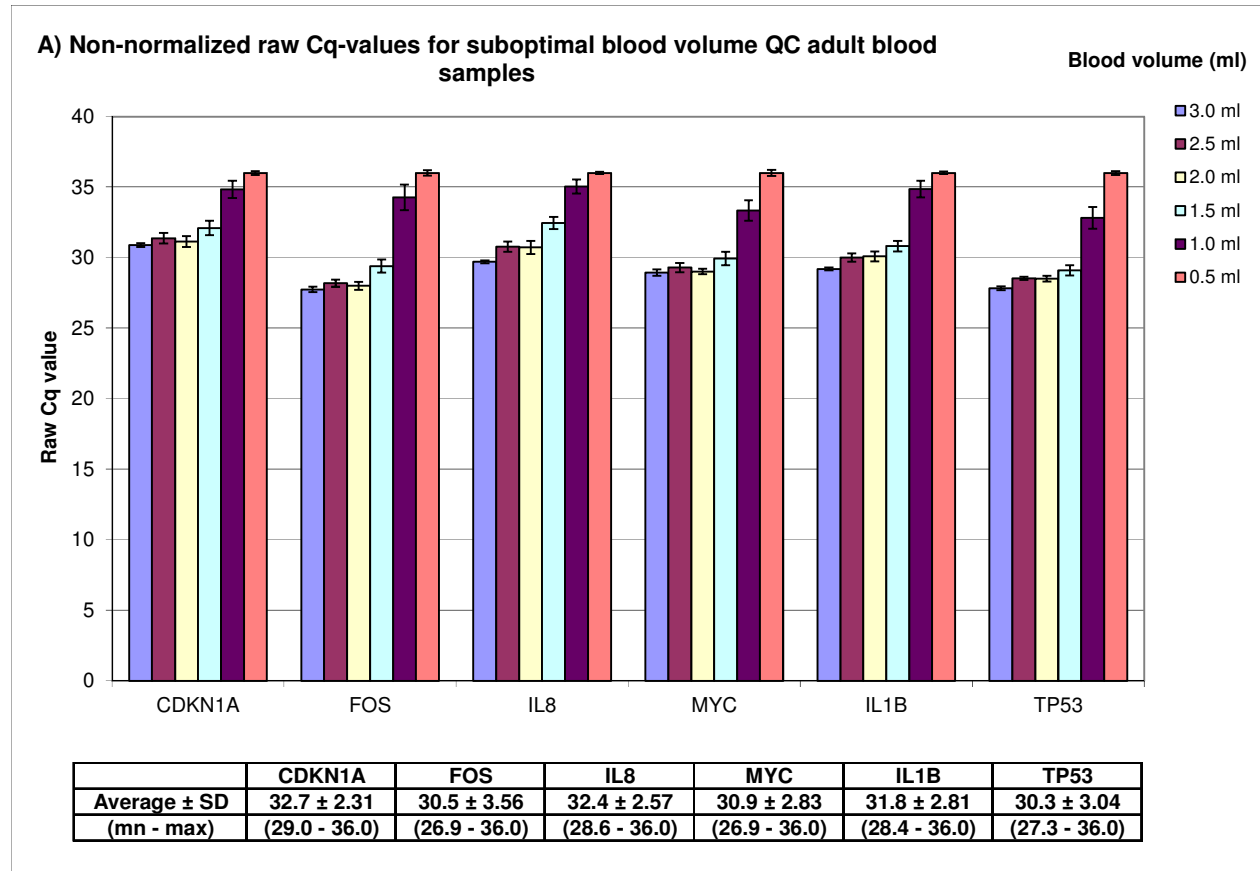

**B) Non-normalized raw Cq-values for suboptimal blood volume QC cord blood samples**

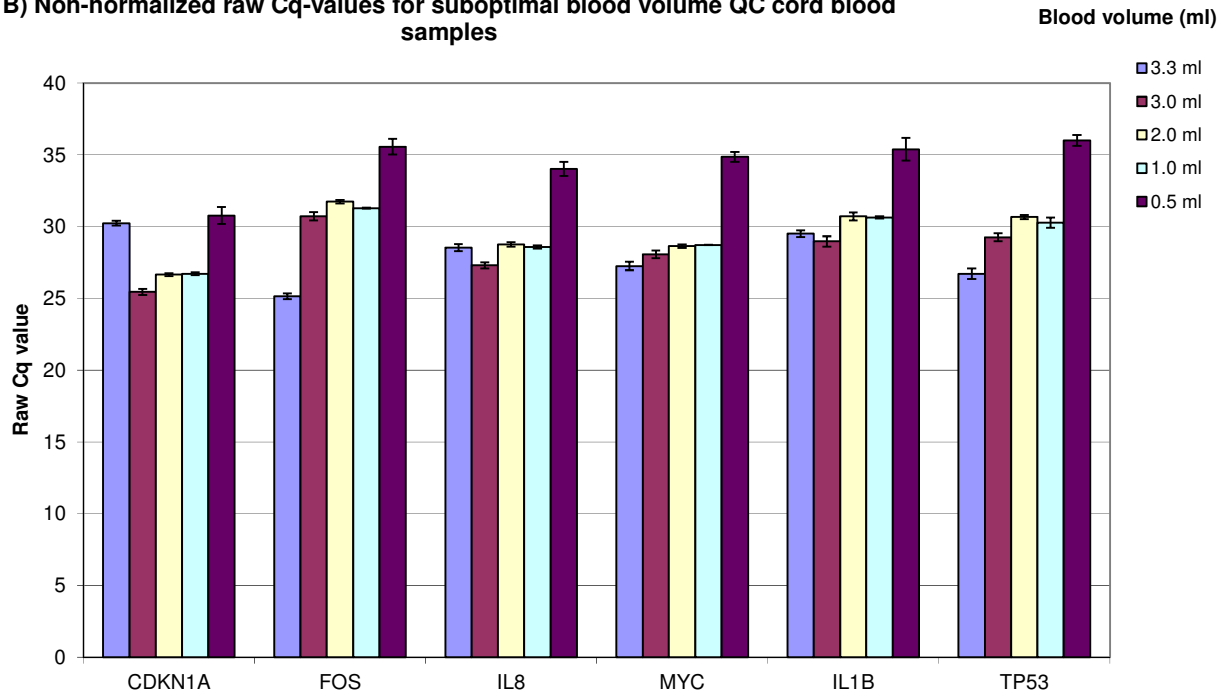

|                     | CDKN1A        | FOS           | IL8           | MYC           | IL1B          | TP53          |
|---------------------|---------------|---------------|---------------|---------------|---------------|---------------|
| <b>Average ± SD</b> | 27.7 ± 2.10   | 30.4 ± 3.20   | 28.9 ± 1.97   | 28.9 ± 2.31   | 30.6 ± 2.00   | 30.0 ± 2.73   |
| <b>(min - max)</b>  | (24.5 - 31.6) | (24.5 - 36.0) | (26.2 - 34.3) | (26.6 - 36.0) | (28.2 - 36.0) | (26.1 - 36.0) |
