# Supplementary material for: Human blood RNA stabilization in samples collected and transported for a large biobank
Source: PubMed Central journal article supplement (PMC3503553; doi:10.1186/1756-0500-5-510), 2012-09-18

### Additional file 1- The evaluation of 18S rRNA expression stability

A) Comparison of PAXgene tube-collected samples against the Tempus tube-collected samples: The C<sub>q</sub> – values for 18S rRNA were relatively stable following the storage of the tubes for up to seven days at room temperature for both tubes; B) Evaluation of 18S rRNA stability for transportation QC samples: The C<sub>q</sub> – values for 18S rRNA were relatively stable following the transportation; C) Suboptimal blood volume in the Tempus tubes on 18S rRNA expression stability for adult blood samples: Suboptimal blood volume collected in the tube has a significant effects on 18S rRNA expression stability; and D) Suboptimal blood volume in the Tempus tubes on 18S rRNA expression stability for cord blood samples: Suboptimal blood volume collected in the tube has some effects on 18S rRNA expression stability. Each bar represents the average C<sub>q</sub>-values and the error bar indicates  $\pm$  SE.

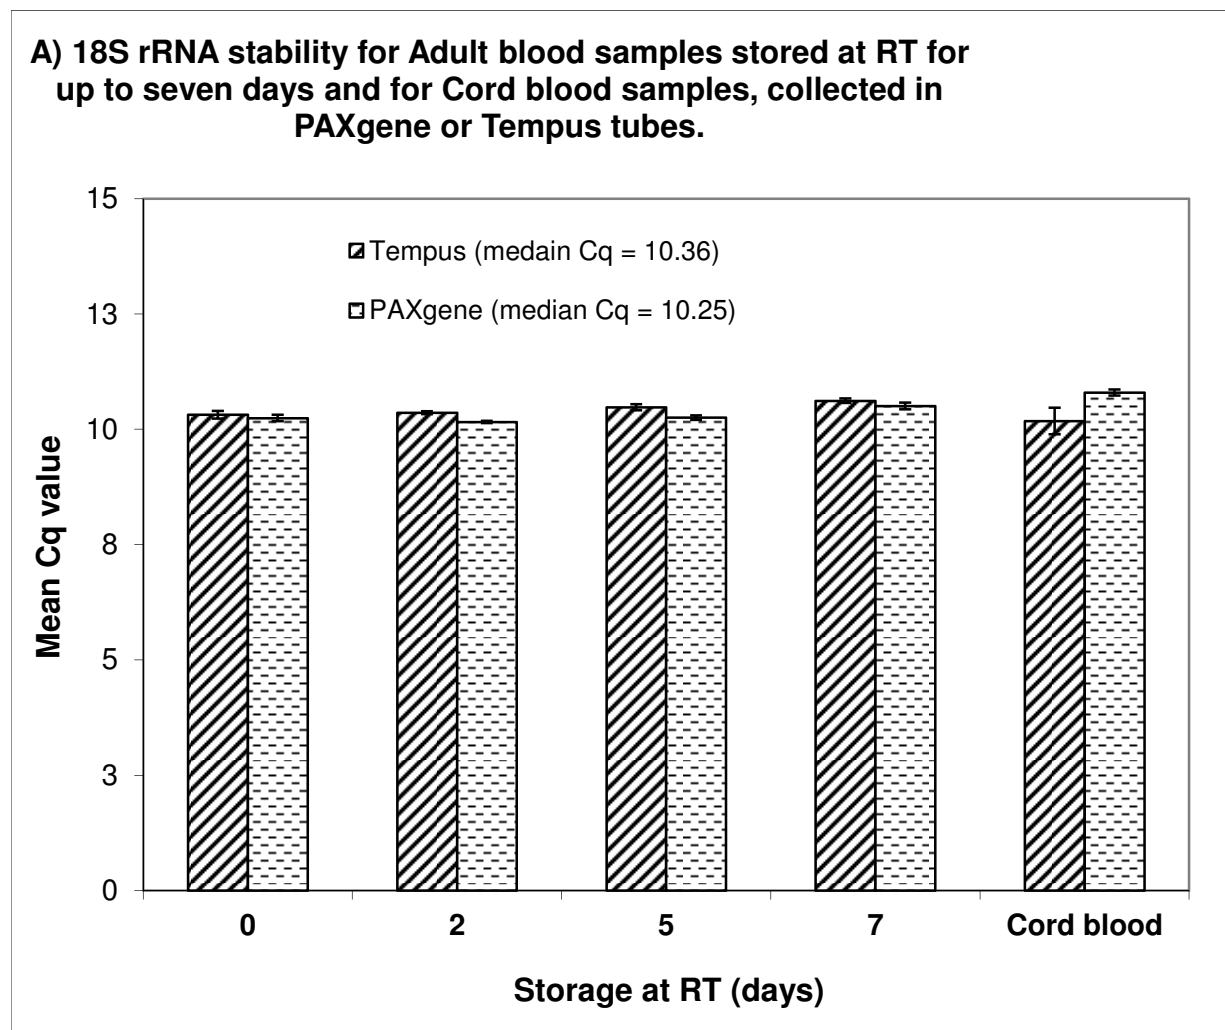

### B) 18S rRNA stability for transportation QC

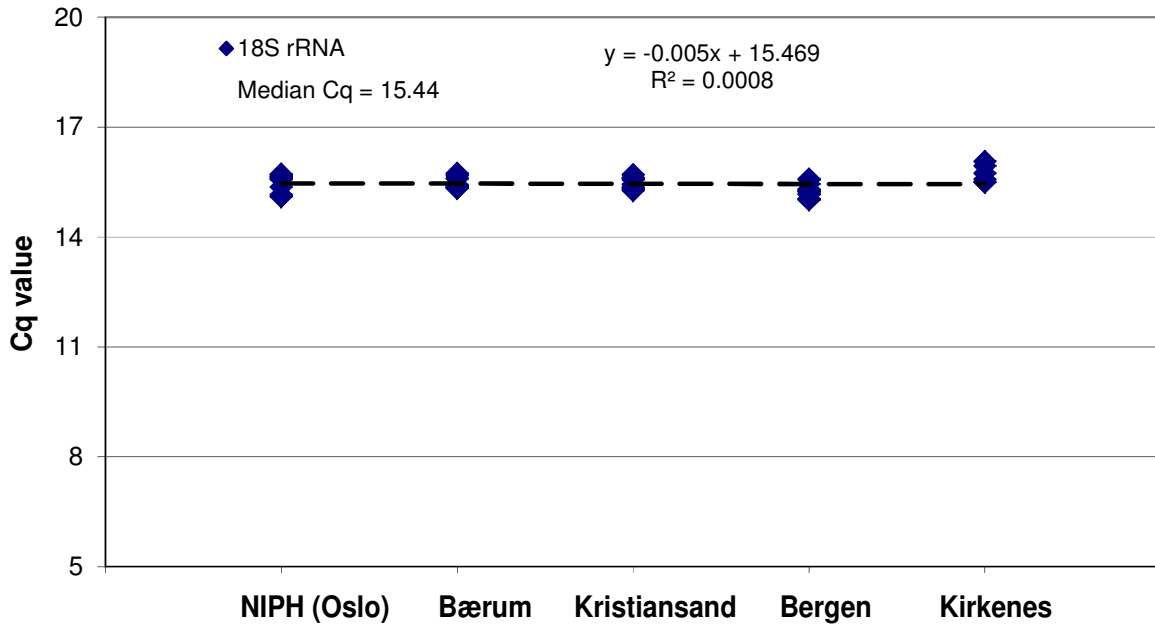

### C) 18S rRNA stability for adult blood samples

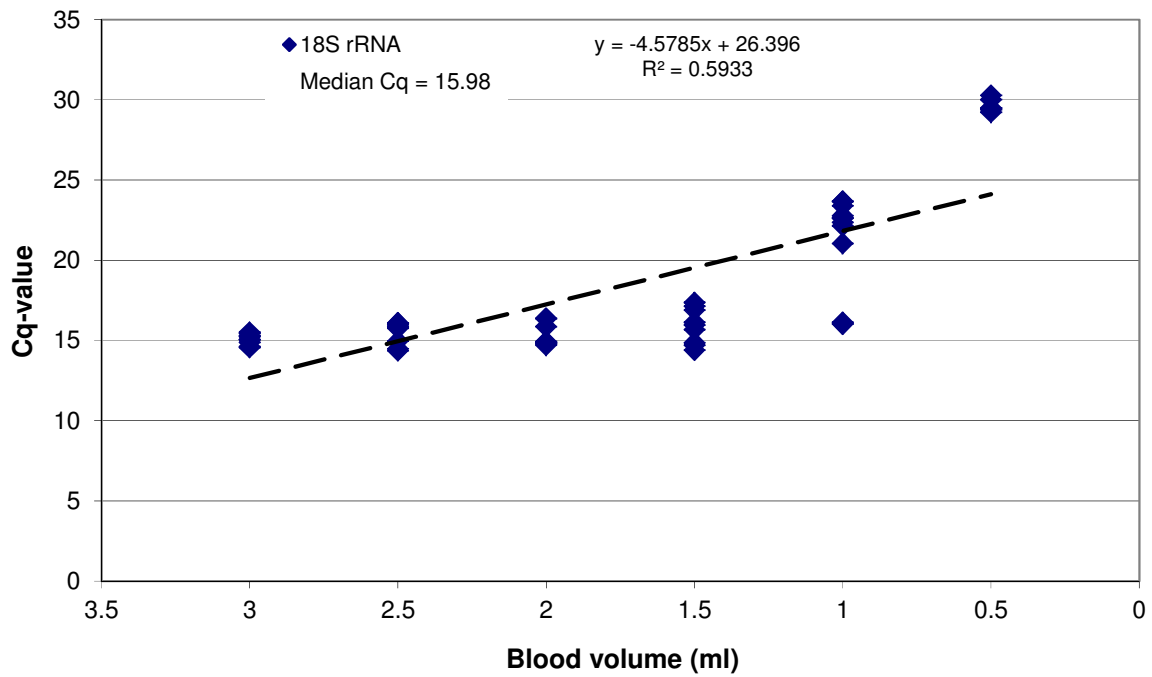

**D) 18S rRNA stability for cord blood samples**

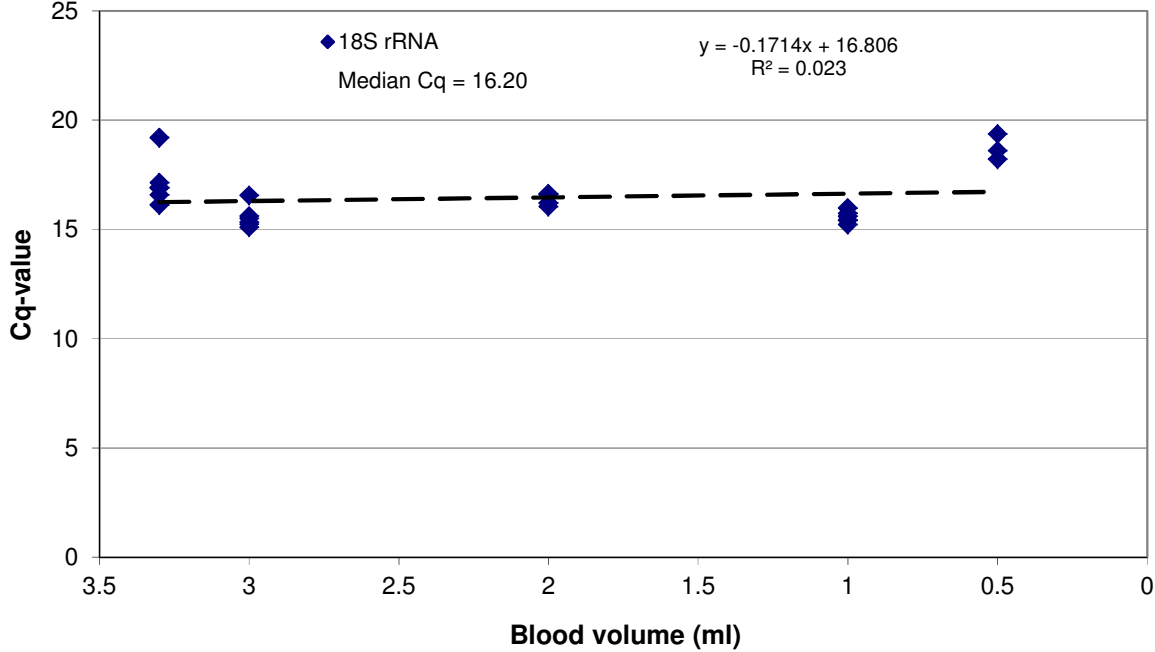

Supplement: 1756-0500-5-510-S4.pdf [file 1756-0500-5-510-S4.pdf]
